# Supplementary material for: Predicting the Recurrence of Gastric Cancer Using the Textural Features of Perigastric Adipose Tissue on [18F]FDG PET/CT
Source: MDPI journal article supplement (doi:10.3390/ijms231911985), 2022-10-09
Supplement: s1 [file s1]

**Article title:** Predicting the recurrence of gastric cancer using the textural features of perigastric adipose tissue on [<sup>18</sup>F]FDG PET/CT

**Author names:** Hyein Ahn, Geum Jong Song, Si-Hyong Jang, Myoung Won Son, Hyun Ju Lee, Moon-Soo Lee, Ji-Hye Lee, Mee-Hye Oh, Geum Cheol Jeong, Jong Hyuk Yun, Sang Mi Lee, Jeong Won Lee

**Corresponding author:** Sang Mi Lee, Department of Nuclear Medicine, Soonchunhyang University Cheonan Hospital

**Co-corresponding author:** Jeong Won Lee, Department of Nuclear Medicine, Catholic Kwandong University College of Medicine, International St. Mary's Hospital

**Table S1.** Comparisons of maximum standardized uptake value (SUV) of gastric cancer lesions and textural features of perigastric adipose tissue according to CD4 cell infiltration grades in perigastric adipose tissue.

| Variables                                   | Grade 0<br>( <i>n</i> = 17) | Grade 1<br>( <i>n</i> = 17) | Grade 2<br>( <i>n</i> = 23) | Grade 3<br>( <i>n</i> = 12) | P-value |
|---------------------------------------------|-----------------------------|-----------------------------|-----------------------------|-----------------------------|---------|
| Maximum SUV of primary tumor                | 3.20<br>(2.65–6.68)         | 3.88<br>(3.00–5.79)         | 4.90<br>(3.31–8.23)         | 6.36<br>(4.60–11.13)        | 0.078   |
| First-order PET features of perigastric AT  |                             |                             |                             |                             |         |
| SUV mean                                    | 0.80<br>(0.65–1.09)         | 1.02<br>(0.77–1.11)         | 1.03<br>(0.90–1.23)         | 1.01<br>(0.91–1.33)         | 0.163   |
| SUV std                                     | 0.25<br>(0.17–0.29)         | 0.22<br>(0.19–0.30)         | 0.26<br>(0.23–0.32)         | 0.25<br>(0.21–0.28)         | 0.469   |
| SUV median                                  | 0.84<br>(0.56–0.99)         | 1.01<br>(0.74–1.13)         | 0.97<br>(0.87–1.29)         | 0.96<br>(0.86–1.33)         | 0.189   |
| SUV histogram kurtosis                      | 3.20<br>(2.82–3.62)         | 3.06<br>(2.78–4.46)         | 2.89<br>(2.50–3.90)         | 3.64<br>(2.49–5.28)         | 0.699   |
| SUV histogram skewness                      | 0.76<br>(0.63–0.95)         | 0.73<br>(0.36–1.25)         | 0.53<br>(0.28–0.97)         | 0.66<br>(0.50–1.12)         | 0.470   |
| SUV histogram energy                        | 0.35<br>(0.31–0.60)         | 0.36<br>(0.33–0.45)         | 0.33<br>(0.27–0.38)         | 0.39<br>(0.31–0.46)         | 0.191   |
| SUV histogram entropy                       | 1.73<br>(0.95–1.90)         | 1.61<br>(1.45–1.93)         | 1.88<br>(1.61–2.17)         | 1.63<br>(1.39–1.89)         | 0.320   |
| Second-order PET features of perigastric AT |                             |                             |                             |                             |         |
| GLCM contrast                               | 0.50<br>(0.25–0.72)         | 0.43<br>(0.37–0.67)         | 0.55<br>(0.42–0.82)         | 0.46<br>(0.33–0.65)         | 0.700   |
| GLCM correlation                            | 0.58<br>(0.52–0.69)         | 0.59<br>(0.51–0.69)         | 0.56<br>(0.37–0.68)         | 0.54<br>(0.44–0.59)         | 0.386   |
| GLCM dissimilarity                          | 0.46<br>(0.25–0.57)         | 0.39<br>(0.35–0.55)         | 0.48<br>(0.39–0.64)         | 0.38<br>(0.32–0.54)         | 0.648   |
| GLCM energy                                 | 0.23<br>(0.19–0.46)         | 0.23<br>(0.18–0.26)         | 0.18<br>(0.14–0.24)         | 0.26<br>(0.17–0.32)         | 0.122   |
| GLCM entropy                                | 2.68<br>(1.75–2.88)         | 2.66<br>(2.32–3.17)         | 2.92<br>(2.52–3.29)         | 2.31<br>(2.15–2.83)         | 0.106   |
| GLCM homogeneity                            | 0.78<br>(0.73–0.88)         | 0.81<br>(0.74–0.83)         | 0.78<br>(0.71–0.81)         | 0.82<br>(0.75–0.85)         | 0.612   |

Expressed in median (25<sup>th</sup> percentile–75<sup>th</sup> percentile)

AT, adipose tissue; GLCM, grey-level co-occurrence matrix; PET, positron emission tomography; std, standard deviation

**Table S2.** Comparisons of maximum standardized uptake value (SUV) of gastric cancer lesions and textural features of perigastric adipose tissue according to CD8 cell infiltration grades in perigastric adipose tissue.

| Variables                                   | Grade 0<br>(n = 16) | Grade 1<br>(n = 17) | Grade 2<br>(n = 19) | Grade 3<br>(n = 17)  | P-value |
|---------------------------------------------|---------------------|---------------------|---------------------|----------------------|---------|
| Maximum SUV of primary tumor                | 3.80<br>(2.52–6.21) | 3.39<br>(2.99–5.51) | 5.09<br>(3.23–8.19) | 4.99<br>(4.06–10.49) | 0.149   |
| First-order PET features of perigastric AT  |                     |                     |                     |                      |         |
| SUV mean                                    | 0.80<br>(0.67–1.04) | 1.02<br>(0.77–1.09) | 1.05<br>(1.01–1.40) | 0.99<br>(0.88–1.21)  | 0.072   |
| SUV std                                     | 0.25<br>(0.18–0.29) | 0.25<br>(0.21–0.31) | 0.26<br>(0.20–0.36) | 0.27<br>(0.22–0.28)  | 0.949   |
| SUV median                                  | 0.87<br>(0.61–0.98) | 0.93<br>(0.71–1.11) | 1.03<br>(0.95–1.39) | 0.94<br>(0.82–1.22)  | 0.062   |
| SUV histogram kurtosis                      | 3.10<br>(2.81–3.79) | 2.97<br>(2.46–4.12) | 3.20<br>(2.52–4.05) | 3.49<br>(2.47–5.02)  | 0.911   |
| SUV histogram skewness                      | 0.76<br>(0.54–0.94) | 0.75<br>(0.38–1.25) | 0.54<br>(0.14–0.85) | 0.63<br>(0.36–1.08)  | 0.387   |
| SUV histogram energy                        | 0.38<br>(0.32–0.53) | 0.35<br>(0.31–0.39) | 0.36<br>(0.26–0.42) | 0.33<br>(0.30–0.43)  | 0.661   |
| SUV histogram entropy                       | 1.62<br>(1.15–2.54) | 1.79<br>(1.55–1.90) | 1.70<br>(1.48–2.17) | 1.88<br>(1.48–2.09)  | 0.537   |
| Second-order PET features of perigastric AT |                     |                     |                     |                      |         |
| GLCM contrast                               | 0.46<br>(0.30–0.71) | 0.50<br>(0.36–0.68) | 0.49<br>(0.39–0.63) | 0.60<br>(0.40–0.96)  | 0.556   |
| GLCM correlation                            | 0.60<br>(0.49–0.69) | 0.58<br>(0.52–0.69) | 0.57<br>(0.53–0.69) | 0.46<br>(0.36–0.57)  | 0.072   |
| GLCM dissimilarity                          | 0.40<br>(0.29–0.54) | 0.41<br>(0.35–0.57) | 0.45<br>(0.36–0.53) | 0.52<br>(0.33–0.67)  | 0.622   |
| GLCM energy                                 | 0.27<br>(0.20–0.41) | 0.23<br>(0.18–0.25) | 0.19<br>(0.14–0.27) | 0.18<br>(0.15–0.34)  | 0.145   |
| GLCM entropy                                | 2.34<br>(2.12–2.79) | 2.74<br>(2.37–3.04) | 2.85<br>(2.33–3.49) | 2.83<br>(2.06–3.00)  | 0.192   |
| GLCM homogeneity                            | 0.81<br>(0.76–0.85) | 0.80<br>(0.73–0.83) | 0.78<br>(0.75–0.83) | 0.76<br>(0.71–0.84)  | 0.325   |

Expressed in median (25<sup>th</sup> percentile–75<sup>th</sup> percentile)

AT, adipose tissue; GLCM, grey-level co-occurrence matrix; PET, positron emission tomography; std, standard deviation

**Table S3.** Comparisons of maximum standardized uptake value (SUV) of gastric cancer lesions and textural features of perigastric adipose tissue according to CD163 cell infiltration grades in perigastric adipose tissue.

| Variables                                   | Grade 0<br>(n = 10) | Grade 1<br>(n = 20) | Grade 2<br>(n = 23) | Grade 3<br>(n = 16)  | P-value       |
|---------------------------------------------|---------------------|---------------------|---------------------|----------------------|---------------|
| Maximum SUV of primary tumor                | 2.62<br>(1.81–3.43) | 4.14<br>(3.35–6.83) | 4.64<br>(3.21–7.40) | 6.80<br>(5.01–11.49) | <b>0.006*</b> |
| First-order PET features of perigastric AT  |                     |                     |                     |                      |               |
| SUV mean                                    | 0.72<br>(0.59–1.01) | 0.98<br>(0.76–1.34) | 1.00<br>(0.84–1.18) | 1.06<br>(1.02–1.28)  | <b>0.037*</b> |
| SUV std                                     | 0.19<br>(0.11–0.31) | 0.25<br>(0.22–0.30) | 0.26<br>(0.19–0.31) | 0.26<br>(0.23–0.30)  | 0.402         |
| SUV median                                  | 0.78<br>(0.56–0.93) | 0.94<br>(0.71–1.23) | 0.96<br>(0.83–1.46) | 1.07<br>(0.92–1.32)  | 0.095         |
| SUV histogram kurtosis                      | 3.33<br>(2.36–4.12) | 3.25<br>(2.81–4.28) | 2.78<br>(2.36–3.49) | 3.64<br>(2.63–4.33)  | 0.330         |
| SUV histogram skewness                      | 0.86<br>(0.54–1.00) | 0.75<br>(0.58–0.93) | 0.53<br>(0.23–0.78) | 0.66<br>(0.39–1.23)  | 0.496         |
| SUV histogram energy                        | 0.55<br>(0.34–0.62) | 0.35<br>(0.31–0.40) | 0.34<br>(0.29–0.46) | 0.34<br>(0.30–0.38)  | 0.095         |
| SUV histogram entropy                       | 1.06<br>(0.68–1.77) | 1.76<br>(1.54–1.91) | 1.75<br>(1.44–1.90) | 1.88<br>(1.63–2.29)  | <b>0.030*</b> |
| Second-order PET features of perigastric AT |                     |                     |                     |                      |               |
| GLCM contrast                               | 0.35<br>(0.21–0.50) | 0.50<br>(0.38–0.72) | 0.55<br>(0.37–0.76) | 0.54<br>(0.42–0.77)  | 0.216         |
| GLCM correlation                            | 0.60<br>(0.55–0.73) | 0.58<br>(0.37–0.68) | 0.55<br>(0.45–0.61) | 0.56<br>(0.49–0.68)  | 0.356         |
| GLCM dissimilarity                          | 0.31<br>(0.21–0.46) | 0.41<br>(0.35–0.60) | 0.50<br>(0.37–0.60) | 0.47<br>(0.38–0.58)  | 0.097         |
| GLCM energy                                 | 0.33<br>(0.25–0.55) | 0.23<br>(0.18–0.27) | 0.18<br>(0.16–0.29) | 0.19<br>(0.14–0.28)  | <b>0.023†</b> |
| GLCM entropy                                | 2.03<br>(1.49–2.66) | 2.65<br>(2.36–2.91) | 2.85<br>(2.23–3.19) | 2.84<br>(2.24–3.22)  | <b>0.035‡</b> |
| GLCM homogeneity                            | 0.85<br>(0.78–0.90) | 0.81<br>(0.72–0.83) | 0.76<br>(0.73–0.83) | 0.75<br>(0.71–0.82)  | 0.115         |

Expressed in median (25<sup>th</sup> percentile–75<sup>th</sup> percentile)

AT, adipose tissue; GLCM, grey-level co-occurrence matrix; PET, positron emission tomography; std, standard deviation

\*On post-hoc analysis, patients with grade 3 had significantly higher values of parameters than those with grade 0 (p<0.05)

†On post-hoc analysis, patients with grade 2 and 3 had significantly lower values of parameters than those with grade 0 (p<0.05)

‡On post-hoc analysis, patients with grade 2 and 3 had significantly higher values of parameters than those with grade 0 (p<0.05)

**Table S4.** Comparisons of maximum standardized uptake value (SUV) of gastric cancer lesions and textural features of perigastric adipose tissue according to matrix metalloproteinase-11 expression grades in perigastric adipose tissue.

| Variables                                   | Grade 0<br>( <i>n</i> = 14) | Grade 1<br>( <i>n</i> = 22) | Grade 2<br>( <i>n</i> = 23) | Grade 3<br>( <i>n</i> = 10) | P-value |
|---------------------------------------------|-----------------------------|-----------------------------|-----------------------------|-----------------------------|---------|
| Maximum SUV of primary tumor                | 3.78<br>(2.46–4.90)         | 4.44<br>(3.23–0.12)         | 4.89<br>(3.36–7.43)         | 5.22<br>(2.83–10.10)        | 0.458   |
| First-order PET features of perigastric AT  |                             |                             |                             |                             |         |
| SUV mean                                    | 0.91<br>(0.68–1.01)         | 1.03<br>(0.92–1.18)         | 0.90<br>(0.73–1.31)         | 1.08<br>(1.02–1.30)         | 0.099   |
| SUV std                                     | 0.26<br>(2.22–0.31)         | 0.25<br>(0.18–0.30)         | 0.23<br>(0.19–0.28)         | 0.29<br>(0.23–0.36)         | 0.583   |
| SUV median                                  | 0.86<br>(0.64–0.95)         | 0.98<br>(0.90–1.15)         | 0.91<br>(0.69–1.34)         | 1.09<br>(0.93–1.21)         | 0.122   |
| SUV histogram kurtosis                      | 3.30<br>(2.82–4.12)         | 2.99<br>(2.40–4.55)         | 3.07<br>(2.60–4.64)         | 3.17<br>(2.22–3.64)         | 0.714   |
| SUV histogram skewness                      | 0.91<br>(0.70–1.00)         | 0.63<br>(0.37–0.94)         | 0.72<br>(0.36–1.13)         | 0.48<br>(0.10–0.79)         | 0.226   |
| SUV histogram energy                        | 0.35<br>(0.32–0.40)         | 0.36<br>(0.30–0.49)         | 0.37<br>(0.30–0.46)         | 0.31<br>(0.29–0.36)         | 0.596   |
| SUV histogram entropy                       | 1.74<br>(1.53–1.84)         | 1.73<br>(1.43–1.91)         | 1.70<br>(1.39–2.05)         | 1.97<br>(1.70–2.29)         | 0.392   |
| Second-order PET features of perigastric AT |                             |                             |                             |                             |         |
| GLCM contrast                               | 0.53<br>(0.31–0.72)         | 0.58<br>(0.37–0.80)         | 0.46<br>(0.38–0.55)         | 0.60<br>(0.40–0.93)         | 0.687   |
| GLCM correlation                            | 0.57<br>(0.53–0.64)         | 0.56<br>(0.42–0.63)         | 0.54<br>(0.45–0.68)         | 0.60<br>(0.58–0.64)         | 0.469   |
| GLCM dissimilarity                          | 0.48<br>(0.30–0.54)         | 0.50<br>(0.34–0.63)         | 0.41<br>(0.34–0.49)         | 0.49<br>(0.39–0.61)         | 0.721   |
| GLCM energy                                 | 0.24<br>(0.18–0.29)         | 0.21<br>(0.14–0.34)         | 0.23<br>(0.18–0.33)         | 0.18<br>(0.15–0.23)         | 0.752   |
| GLCM entropy                                | 2.52<br>(2.30–3.13)         | 2.83<br>(2.17–3.20)         | 2.62<br>(2.14–2.92)         | 3.05<br>(2.63–3.23)         | 0.296   |
| GLCM homogeneity                            | 0.77<br>(0.75–0.85)         | 0.76<br>(0.71–0.84)         | 0.81<br>(0.76–0.84)         | 0.77<br>(0.73–0.81)         | 0.721   |

Expressed in median (25<sup>th</sup> percentile–75<sup>th</sup> percentile)

AT, adipose tissue; GLCM, grey-level co-occurrence matrix; PET, positron emission tomography; std, standard deviation

**Table S5.** Comparisons of maximum standardized uptake value (SUV) of gastric cancer lesions and textural features of perigastric adipose tissue according to interleukin-6 expression grades in perigastric adipose tissue.

| Variables                                   | Grade 0<br>(n = 28) | Grade 1<br>(n = 24) | Grade 2<br>(n = 12) | Grade 3<br>(n = 5)    | P-value       |
|---------------------------------------------|---------------------|---------------------|---------------------|-----------------------|---------------|
| Maximum SUV of primary tumor                | 3.92<br>(2.78–6.15) | 4.95<br>(3.42–7.51) | 4.14<br>(2.62–7.55) | 10.66<br>(4.99–12.62) | 0.094         |
| First-order PET features of perigastric AT  |                     |                     |                     |                       |               |
| SUV mean                                    | 0.96<br>(0.69–1.08) | 1.01<br>(0.84–1.16) | 1.02<br>(0.90–1.26) | 1.31<br>(1.22–1.50)   | <b>0.042*</b> |
| SUV std                                     | 0.25<br>(0.20–0.31) | 0.26<br>(0.20–0.30) | 0.22<br>(0.18–0.28) | 0.31<br>(0.25–0.37)   | 0.343         |
| SUV median                                  | 0.93<br>(0.67–1.06) | 0.94<br>(0.80–1.12) | 1.01<br>(0.91–1.26) | 1.34<br>(1.25–1.48)   | <b>0.025†</b> |
| SUV histogram kurtosis                      | 3.19<br>(2.49–4.77) | 3.12<br>(2.69–4.31) | 2.89<br>(2.45–3.71) | 3.37<br>(2.70–3.91)   | 0.869         |
| SUV histogram skewness                      | 0.76<br>(0.49–1.11) | 0.72<br>(0.52–1.12) | 0.43<br>(0.14–0.76) | 0.51<br>(0.27–0.79)   | 0.170         |
| SUV histogram energy                        | 0.36<br>(0.30–0.51) | 0.35<br>(0.32–0.41) | 0.38<br>(0.30–0.45) | 0.29<br>(0.23–0.33)   | 0.261         |
| SUV histogram entropy                       | 1.74<br>(1.27–1.90) | 1.73<br>(1.49–1.91) | 1.60<br>(1.42–1.99) | 2.06<br>(1.79–2.30)   | 0.493         |
| Second-order PET features of perigastric AT |                     |                     |                     |                       |               |
| GLCM contrast                               | 0.52<br>(0.32–0.72) | 0.47<br>(0.38–0.70) | 0.45<br>(0.36–0.56) | 0.63<br>(0.49–0.85)   | 0.638         |
| GLCM correlation                            | 0.57<br>(0.48–0.63) | 0.57<br>(0.51–0.68) | 0.51<br>(0.39–0.60) | 0.68<br>(0.58–0.74)   | 0.292         |
| GLCM dissimilarity                          | 0.47<br>(0.31–0.58) | 0.41<br>(0.36–0.56) | 0.43<br>(0.33–0.50) | 0.48<br>(0.42–0.65)   | 0.830         |
| GLCM energy                                 | 0.25<br>(0.18–0.35) | 0.23<br>(0.19–0.29) | 0.20<br>(0.15–0.28) | 0.13<br>(0.11–0.16)   | 0.066         |
| GLCM entropy                                | 2.48<br>(2.15–2.94) | 2.68<br>(2.20–2.97) | 2.75<br>(2.19–3.14) | 3.14<br>(2.84–3.47)   | 0.097         |
| GLCM homogeneity                            | 0.78<br>(0.73–0.85) | 0.81<br>(0.74–0.83) | 0.76<br>(0.76–0.84) | 0.78<br>(0.71–0.80)   | 0.927         |

Expressed in median (25<sup>th</sup> percentile–75<sup>th</sup> percentile)

AT, adipose tissue; GLCM, grey-level co-occurrence matrix; PET, positron emission tomography; std, standard deviation

\*On post-hoc analysis, patients with grade 3 had significantly higher values of parameters than those with grade 0 (p<0.05)

† On post-hoc analysis, patients with grade 3 had significantly higher values of parameters than those with grade 0 and 1 (p<0.05)
